# Supplementary material for: Hierarchical flower-like ZnIn2S4 anchored with well-dispersed Ni12P5 nanoparticles for high-quantum-yield photocatalytic H2 evolution under visible light
Source: Royal Society of Chemistry journal article supplement (doi:10.1039/c9cy00901a), 2019-01-01
Supplement: c9cy00901a1.pdf [file c9cy00901a1.pdf]

## Supporting Information

### **Hierarchical flower-like ZnIn<sub>2</sub>S<sub>4</sub> anchored with well-dispersed Ni<sub>12</sub>P<sub>5</sub> nanoparticles for high-quantum-yield photocatalytic H<sub>2</sub> evolution under visible light**

Deqian Zeng,<sup>\*ab</sup> Zhiqing Lu,<sup>ab</sup> Xueyou Gao,<sup>ab</sup> Bingjia Wu<sup>ab</sup> and Wee-Jun Ong<sup>\*cd</sup>

<sup>a</sup> *School of Resources, Environment and Materials, Guangxi University, Nanning 530004, China*

<sup>b</sup> *Guangxi Key Laboratory of Processing for Non-Ferrous Metals and Featured Materials, Guangxi University, Nanning 530004, China*

<sup>c</sup> *School of Energy and Chemical Engineering, Xiamen University Malaysia, Selangor Darul Ehsan 43900, Malaysia*

<sup>d</sup> *College of Chemistry and Chemical Engineering, Xiamen University, Xiamen 361005, China*

\*Corresponding authors:

[dqzeng@gxu.edu.cn](mailto:dqzeng@gxu.edu.cn) (D. Zeng);

[weejun.ong@xmu.edu.my](mailto:weejun.ong@xmu.edu.my); [ongweejun@gmail.com](mailto:ongweejun@gmail.com) (W.-J. Ong)

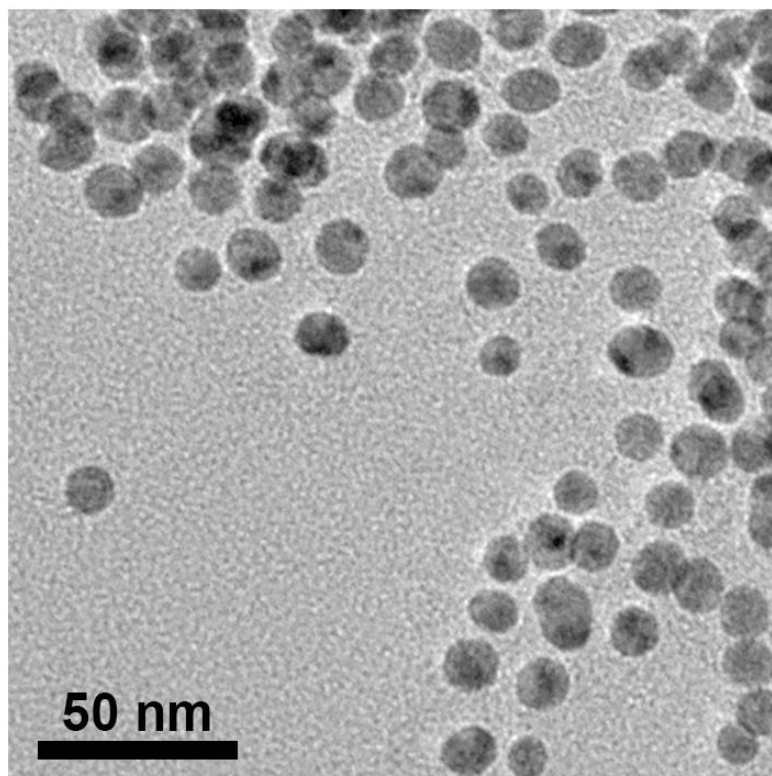

**Fig. S1.** TEM image of Ni<sub>12</sub>P<sub>5</sub> nanoparticles.

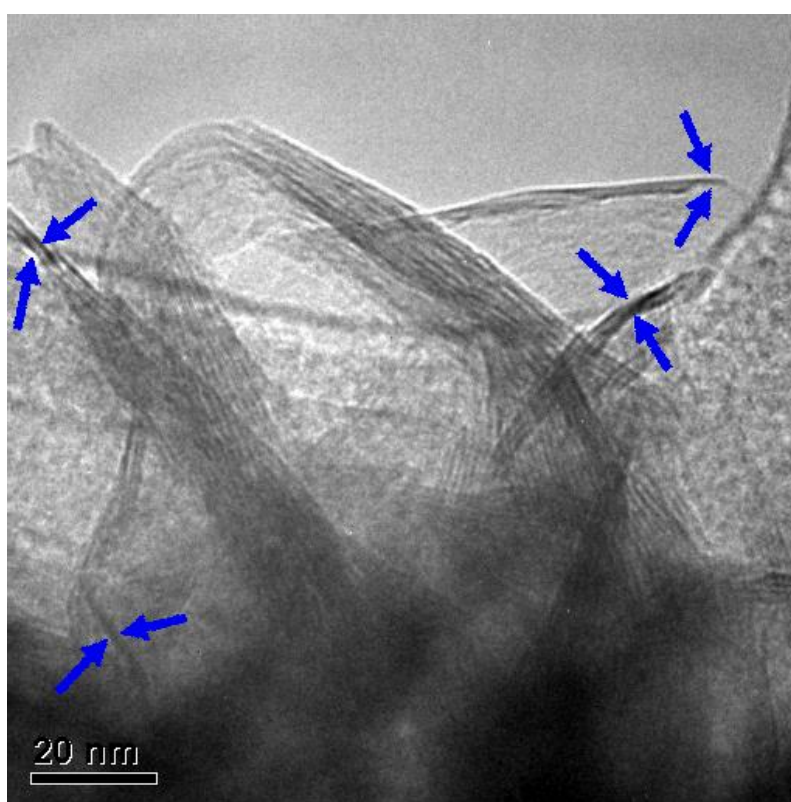

**Fig. S2.** High-magnification TEM image of ZnIn<sub>2</sub>S<sub>4</sub>.

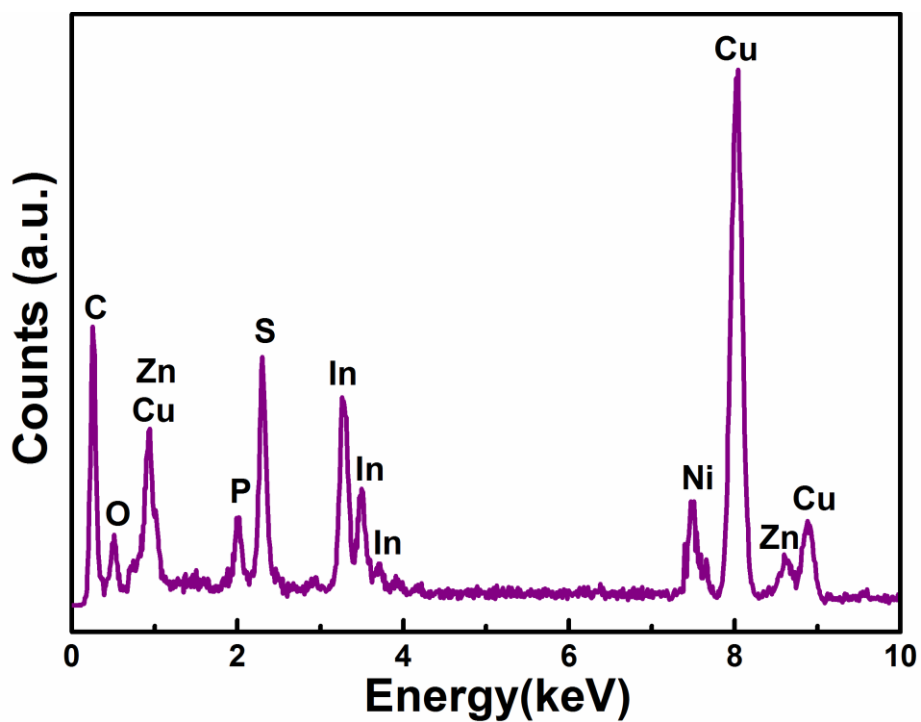

Fig. S3. EDX spectrum of ZnIn<sub>2</sub>S<sub>4</sub>/Ni<sub>12</sub>P<sub>5</sub> composites.

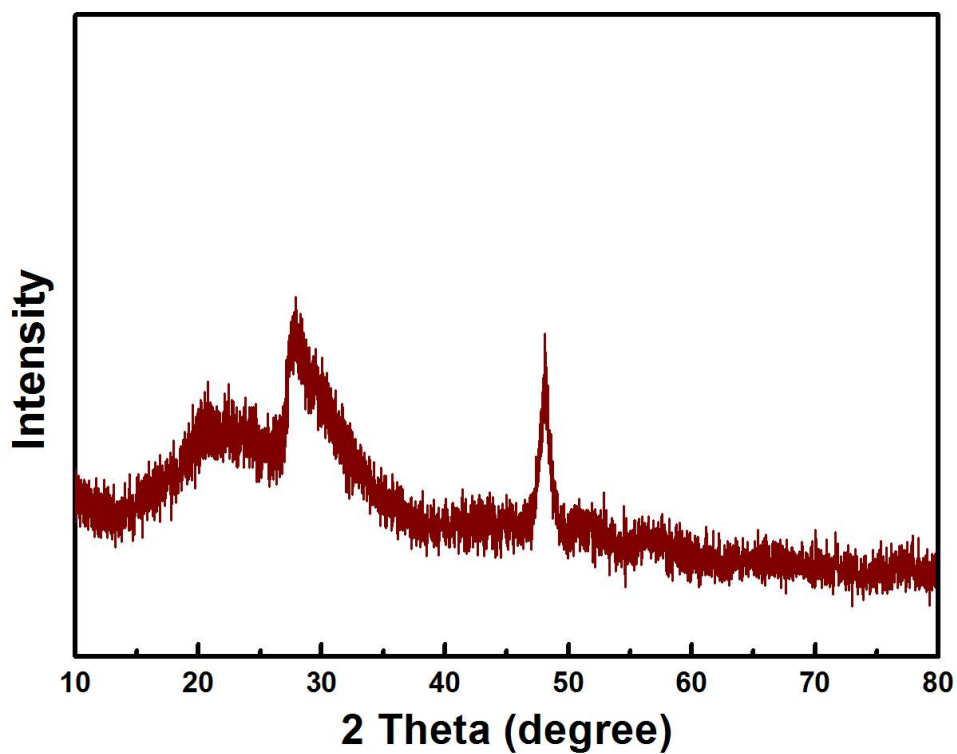

Fig. S4. XRD pattern of spent ZnIn<sub>2</sub>S<sub>4</sub>/Ni<sub>12</sub>P<sub>5</sub> composites.

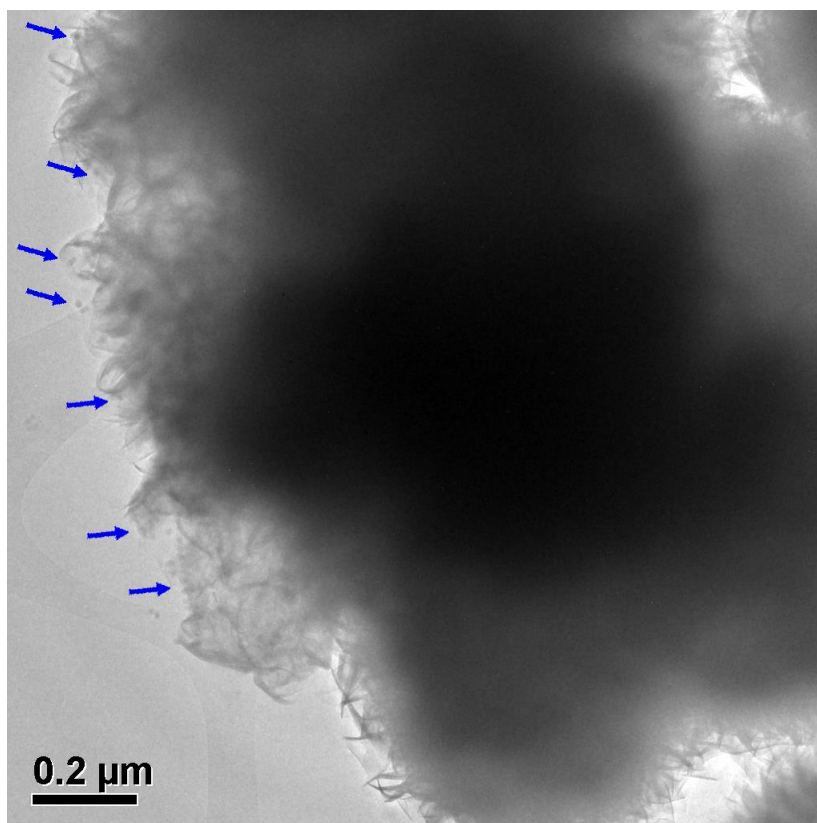

**Fig. S5.** TEM image of spent ZnIn<sub>2</sub>S<sub>4</sub>/Ni<sub>12</sub>P<sub>5</sub> composites.

**Table S1.** Comparison of the photocatalytic H<sub>2</sub> evolution activity of the ZnIn<sub>2</sub>S<sub>4</sub>-based system decorated with precious-metal-free cocatalysts.

| Catalyst<br>(Mass)                                                 | Cocatalysts<br>(Loading)              | Light source                                    | Sacrificial<br>reagent                                             | Activity<br>( $\mu\text{mol h}^{-1} \text{g}^{-1}$ ) | AQY (%)<br>(Wavelength) | Ref. |
|--------------------------------------------------------------------|---------------------------------------|-------------------------------------------------|--------------------------------------------------------------------|------------------------------------------------------|-------------------------|------|
| ZnIn <sub>2</sub> S <sub>4</sub> /RGO/MoS <sub>2</sub><br>(0.10 g) | RGO/MoS <sub>2</sub><br>(0.5 wt% RGO) | 300 W Xe lamp<br>( $\lambda > 420 \text{ nm}$ ) | Lactic acid                                                        | 1620                                                 | 0.4<br>(420 nm)         | 1    |
| RGO/ZnIn <sub>2</sub> S <sub>4</sub><br>(0.05 g)                   | RGO<br>(1 wt%)                        | 300 W Xe lamp<br>( $\lambda > 420 \text{ nm}$ ) | Lactic acid                                                        | 817                                                  | ---                     | 2    |
| CNFs@ZnIn <sub>2</sub> S <sub>4</sub><br>(0.03 g)                  | CNFs<br>(15 wt%)                      | 300 W Xe lamp<br>( $\lambda > 420 \text{ nm}$ ) | 0.25 M Na <sub>2</sub> SO <sub>3</sub><br>0.35 M Na <sub>2</sub> S | 3167                                                 | 25.35<br>(420 nm)       | 3    |
| ZnIn <sub>2</sub> S <sub>4</sub> /MoSe <sub>2</sub><br>(0.06 g)    | MoSe <sub>2</sub><br>(2 wt%)          | 300 W Xe lamp<br>( $\lambda > 420 \text{ nm}$ ) | 0.25 M Na <sub>2</sub> SO <sub>3</sub><br>0.35 M Na <sub>2</sub> S | 2228                                                 | 21.39<br>(420 nm)       | 4    |
| Ni <sub>2</sub> P/ZnIn <sub>2</sub> S <sub>4</sub><br>(0.05 g)     | Ni <sub>2</sub> P<br>(10 wt%)         | 300 W Xe lamp<br>( $\lambda > 400 \text{ nm}$ ) | Lactic acid                                                        | 2066                                                 | 7.7<br>(420 nm)         | 5    |
| MoS <sub>2</sub> /ZnIn <sub>2</sub> S <sub>4</sub><br>(0.08 g)     | MoS <sub>2</sub><br>(15 wt%)          | 300 W Xe lamp<br>( $\lambda > 420 \text{ nm}$ ) | 0.25 M Na <sub>2</sub> SO <sub>3</sub><br>0.35 M Na <sub>2</sub> S | 975                                                  | ---                     | 6    |

|                                                                                      |                                                       |                                                |                                                                             |             |                                |                 |
|--------------------------------------------------------------------------------------|-------------------------------------------------------|------------------------------------------------|-----------------------------------------------------------------------------|-------------|--------------------------------|-----------------|
| ZnIn <sub>2</sub> S <sub>4</sub> @In(OH) <sub>3</sub><br>(0.01 g)                    | In(OH) <sub>3</sub><br>(-)                            | 300 W Xe lamp<br>(λ > 400 nm)                  | 0.35 M Na <sub>2</sub> SO <sub>3</sub><br>0.25 M Na <sub>2</sub> S          | 522         | 1.45<br>(400 nm)               | 7               |
| <b>ZnIn<sub>2</sub>S<sub>4</sub>/Ni<sub>12</sub>P<sub>5</sub></b><br><b>(0.05 g)</b> | <b>Ni<sub>12</sub>P<sub>5</sub></b><br><b>(1 wt%)</b> | <b>300 W Xe lamp</b><br><b>(λ &gt; 420 nm)</b> | <b>0.25 M Na<sub>2</sub>SO<sub>3</sub></b><br><b>0.35 M Na<sub>2</sub>S</b> | <b>2263</b> | <b>20.5</b><br><b>(420 nm)</b> | <b>Our work</b> |

RGO, Reduced Graphene Oxide; CNFs, carbon nanofibers

## References

1. N. Ding, Y. Fan, Y. Luo, D. Li and Q. Meng, *APL Mater.*, 2015, **3**, 104417.
2. L. Ye, J. Fu, Z. Xu, R. Yuan and Z. Li, *ACS Appl. Mater. Interfaces*, 2014, **6**, 3483-3490.
3. Y. Chen, G. Tian, Z. Ren, K. Pan, Y. Shi, J. Wang and H. Fu, *ACS Appl. Mater. Interfaces*, 2014, **6**, 13841-13849.
4. D. Zeng, L. Xiao, W.-J. Ong, P. Wu, H. Zheng, Y. Chen and D.-L. Peng, *ChemSusChem*, 2017, **10**, 4624-4631.
5. X.-l. Li, X.-j. Wang, J.-y. Zhu, Y.-p. Li, J. Zhao and F.-t. Li, *Chem. Eng. J.*, 2018, **353**, 15-24.
6. G. Tian, Y. Chen, Z. Ren, C. Tian, K. Pan, W. Zhou, J. Wang and H. Fu, *Chem. - Asian J.*, 2014, **9**, 1291-1297.
7. M. Geng, Y. Peng, Y. Zhang, X. Guo, F. Yu, X. Yang, G. Xie, W. Dong, C. Liu, J. Li and J. Yu, *Int. J. Hydrogen Energy*, 2019, **44**, 5787-5798.
